# Supplementary material
Source: publisher figshare collection journal article supplement (https://acs.figshare.com/ndownloader/files/5868738)
Supplement: Supplementary file 1 [file 5868738]

## Supplementary Material For:

# Insights into the Nature of the Chemical Bonding in Thiophene-2-Thiol from X-ray Absorption Spectroscopy

*Julien J. H. Cotelesage,<sup>†</sup> M. Jake Pushie,<sup>†</sup> Linda Vogt,<sup>†,¶</sup> Monica Barney,<sup>‡</sup> Andrew Nissan,<sup>‡</sup>  
Ingrid J. Pickering,<sup>†,¶</sup> and Graham N. George<sup>\*†,¶</sup>*

<sup>†</sup> Molecular and Environmental Sciences Group, Department of Geological Sciences, University  
of Saskatchewan, Saskatoon, Saskatchewan S7N 5E2, Canada

<sup>¶</sup> Department of Chemistry, University of Saskatchewan, Saskatoon, Saskatchewan, S7N 5C9,  
Canada

<sup>‡</sup> Chevron Energy Technology Company, Richmond, California 94802 USA

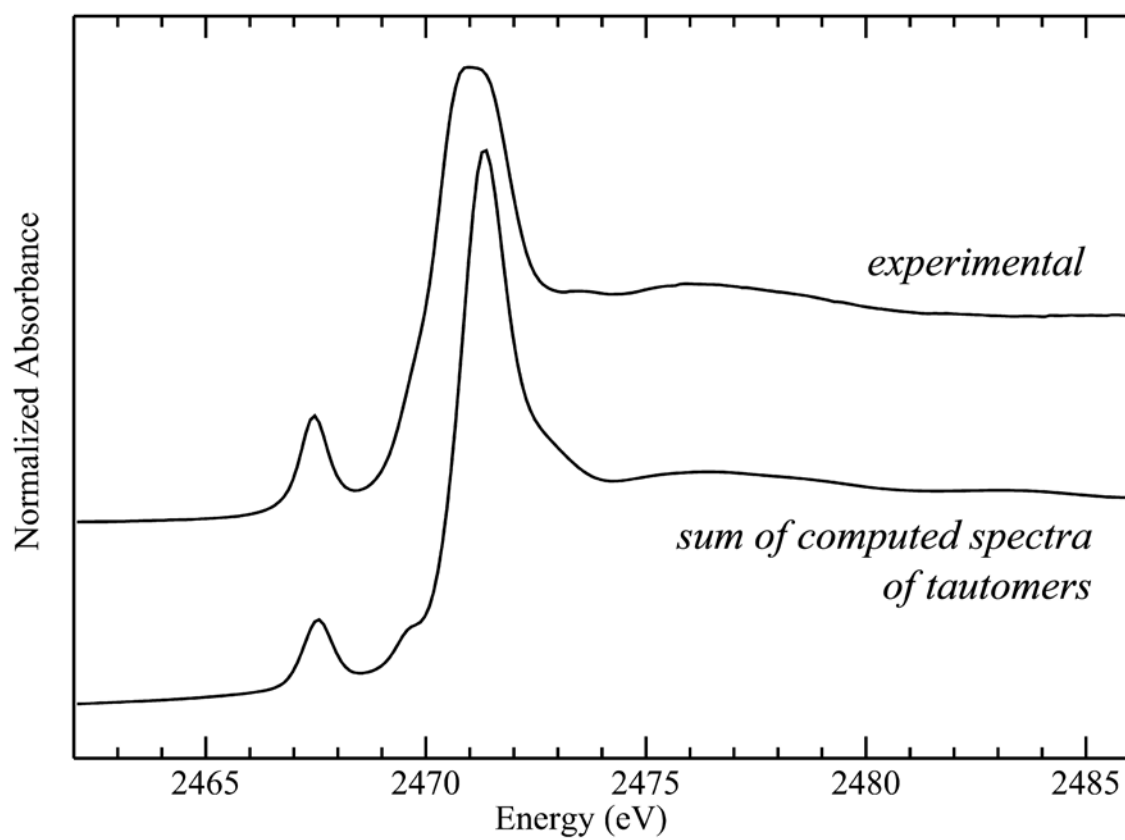

**Figure S1.** Comparison of sum of StoBe-DeMon DFT simulated spectra (68% **1** + 32% **2**) with the experimental spectra for thiophene-2-thiol in toluene solution.
